# Supplementary material for: Molecular Modeling Studies of Some Uracil and New Deoxyuridine Derivatives
Source: Hindawi journal article supplement (doi:10.1155/2016/5134732), 2016-01-01
Supplement: f1 [file 5134732.f1.pdf]

**Supplementary Table 1.** Optimized geometry (Zm matrix is also given) and Mulliken atomic charges in gas phase and in DMSO of the studied uracil derivatives

**A- 5-FU**

| Tag | Symbol | NA | NB | NC | Bond  | Angle   | Dihedral | Mulliken Charges |                |                |
|-----|--------|----|----|----|-------|---------|----------|------------------|----------------|----------------|
|     |        |    |    |    |       |         |          | V                | DMSO           |                |
|     |        |    |    |    |       |         |          | S <sub>0</sub>   | S <sub>0</sub> | S <sub>1</sub> |
| 1   | F      |    |    |    |       |         |          | -0.274           | -0.381         | -0.276         |
| 2   | C      | 1  |    |    | 1.351 |         |          | 0.189            | 0.496          | 0.192          |
| 3   | C      | 2  | 1  |    | 1.453 | 117.051 |          | 0.650            | 0.505          | 0.655          |
| 4   | N      | 3  | 2  | 1  | 1.399 | 112.504 | -179.963 | -0.806           | -0.716         | -0.814         |
| 5   | C      | 4  | 3  | 2  | 1.388 | 128.019 | -0.027   | 0.903            | 0.721          | 0.917          |
| 6   | N      | 5  | 4  | 3  | 1.381 | 113.626 | 0.004    | -0.777           | -0.598         | -0.786         |
| 7   | C      | 2  | 1  | 3  | 1.349 | 121.047 | -179.992 | 0.105            | -0.066         | 0.109          |
| 8   | O      | 5  | 4  | 3  | 1.227 | 123.074 | 179.989  | -0.488           | -0.600         | -0.492         |
| 9   | O      | 3  | 2  | 1  | 1.229 | 125.838 | 0.035    | -0.472           | -0.584         | -0.474         |
| 10  | H      | 4  | 3  | 2  | 1.016 | 116.308 | 179.990  | 0.355            | 0.471          | 0.357          |
| 11  | H      | 6  | 5  | 4  | 1.014 | 116.336 | -179.988 | 0.353            | 0.483          | 0.354          |
| 12  | H      | 7  | 2  | 1  | 1.083 | 122.924 | 0.007    | 0.262            | 0.270          | 0.260          |

**B- U**

| Tag | Symbol | NA | NB | NC | Bond  | Angle   | Dihedral | Mulliken Charges |                |                |
|-----|--------|----|----|----|-------|---------|----------|------------------|----------------|----------------|
|     |        |    |    |    |       |         |          | V                | DMSO           |                |
|     |        |    |    |    |       |         |          | S <sub>0</sub>   | S <sub>0</sub> | S <sub>1</sub> |
| 1   | C      |    |    |    |       |         |          | 0.163            |                |                |
| 2   | C      | 1  |    |    | 1.450 |         |          | 0.291            | 0.148          | 0.172          |
| 3   | N      | 2  | 1  |    | 1.404 | 114.187 |          | -0.551           | -0.527         | -0.543         |
| 4   | C      | 3  | 2  | 1  | 1.382 | 127.387 | -0.063   | 0.674            | 0.700          | 0.671          |
| 5   | N      | 4  | 3  | 2  | 1.383 | 113.701 | 0.042    | -0.447           | -0.418         | -0.440         |
| 6   | C      | 1  | 2  | 3  | 1.355 | 119.620 | 0.037    | -0.090           | -0.105         | -0.092         |
| 7   | O      | 4  | 3  | 2  | 1.229 | 123.307 | 179.923  | -0.520           | -0.601         | -0.526         |
| 8   | O      | 2  | 1  | 6  | 1.234 | 126.078 | 179.919  | -0.507           | -0.608         | -0.514         |
| 9   | H      | 3  | 2  | 1  | 1.015 | 116.776 | 179.877  | 0.339            | 0.353          | 0.342          |
| 10  | H      | 5  | 4  | 3  | 1.012 | 116.116 | -179.945 | 0.333            | 0.363          | 0.335          |
| 11  | H      | 6  | 1  | 2  | 1.083 | 122.891 | 179.928  | 0.159            | 0.196          | 0.159          |
| 12  | H      | 1  | 6  | 5  | 1.081 | 121.492 | -179.913 | 0.158            | 0.172          | 0.159          |

**C- TU**

| Tag | Symbol | NA | NB | NC | Bond  | Angle   | Dihedral | Mulliken Charges |                |                |
|-----|--------|----|----|----|-------|---------|----------|------------------|----------------|----------------|
|     |        |    |    |    |       |         |          | V                | DMSO           |                |
|     |        |    |    |    |       |         |          | S <sub>0</sub>   | S <sub>0</sub> | S <sub>1</sub> |
| 1   | C      |    |    |    |       |         |          | 0.168            | 0.160          | 0.171          |
| 2   | C      | 1  |    |    | 1.433 |         |          | -0.195           | -0.166         | -0.203         |
| 3   | N      | 2  | 1  |    | 1.384 | 114.743 |          | -0.405           | -0.368         | -0.397         |
| 4   | C      | 3  | 2  | 1  | 1.387 | 127.359 | -0.012   | 0.650            | 0.675          | 0.646          |
| 5   | N      | 4  | 3  | 2  | 1.383 | 113.584 | 0.012    | -0.438           | -0.400         | -0.431         |
| 6   | C      | 1  | 2  | 3  | 1.361 | 119.820 | 0.010    | -0.117           | -0.130         | -0.120         |
| 7   | O      | 4  | 3  | 2  | 1.226 | 122.977 | 179.978  | -0.515           | -0.587         | -0.519         |
| 8   | H      | 3  | 2  | 1  | 1.015 | 117.602 | 179.985  | 0.347            | 0.361          | 0.349          |
| 9   | H      | 5  | 4  | 3  | 1.013 | 116.213 | -179.993 | 0.335            | 0.369          | 0.337          |
| 10  | H      | 6  | 1  | 2  | 1.083 | 122.932 | -179.992 | 0.161            | 0.201          | 0.162          |
| 11  | H      | 1  | 6  | 5  | 1.080 | 120.734 | 179.991  | 0.166            | 0.180          | 0.167          |
| 12  | S      | 2  | 1  | 6  | 1.682 | 124.999 | 179.994  | -0.157           | -0.294         | -0.162         |

**D- DTU**

| Tag | Symbol | NA | NB | NC | Bond  | Angle   | Dihedral | Mulliken Charges |                |                |
|-----|--------|----|----|----|-------|---------|----------|------------------|----------------|----------------|
|     |        |    |    |    |       |         |          | V                | DMSO           |                |
|     |        |    |    |    |       |         |          | S <sub>0</sub>   | S <sub>0</sub> | S <sub>1</sub> |
| 1   | C      |    |    |    |       |         |          | 0.191            | 0.194          | 0.194          |
| 2   | C      | 1  |    |    | 1.433 |         |          | -0.269           | -0.250         | -0.279         |
| 3   | N      | 2  | 1  |    | 1.389 | 114.493 |          | -0.278           | -0.235         | -0.272         |
| 4   | C      | 3  | 2  | 1  | 1.372 | 127.474 | 0.010    | 0.114            | 0.127          | 0.109          |
| 5   | N      | 4  | 3  | 2  | 1.368 | 113.867 | -0.019   | -0.338           | -0.290         | -0.332         |
| 6   | C      | 1  | 2  | 3  | 1.360 | 119.654 | 0.003    | -0.148           | -0.160         | -0.149         |
| 7   | H      | 3  | 2  | 1  | 1.015 | 116.849 | 179.999  | 0.355            | 0.368          | 0.357          |
| 8   | H      | 5  | 4  | 3  | 1.013 | 116.496 | -179.963 | 0.342            | 0.375          | 0.344          |
| 9   | H      | 6  | 1  | 2  | 1.083 | 123.372 | -179.997 | 0.164            | 0.206          | 0.165          |
| 10  | H      | 1  | 6  | 5  | 1.080 | 120.857 | 179.997  | 0.170            | 0.187          | 0.172          |
| 11  | S      | 2  | 1  | 6  | 1.677 | 125.358 | 179.996  | -0.141           | -0.264         | -0.144         |
| 12  | S      | 4  | 3  | 2  | 1.676 | 123.034 | 179.975  | -0.163           | -0.259         | -0.164         |

## E- Uridines (I)

| Tag | Symbol | NA | NB | NC | Bond  | Angle   | Dihedral | MM Charge |
|-----|--------|----|----|----|-------|---------|----------|-----------|
| 1   | C      |    |    |    |       |         |          | -0.314    |
| 2   | C      | 1  |    |    | 1.454 |         |          | 0.181     |
| 3   | N      | 2  | 1  |    | 1.409 | 112.960 |          | -0.532    |
| 4   | C      | 3  | 2  | 1  | 1.382 | 128.495 | -0.874   | 0.775     |
| 5   | N      | 4  | 3  | 2  | 1.408 | 114.326 | 1.200    | 0.042     |
| 6   | C      | 1  | 2  | 3  | 1.352 | 120.192 | 0.360    | 0.174     |
| 7   | O      | 4  | 3  | 2  | 1.222 | 122.413 | -179.513 | -0.503    |
| 8   | O      | 2  | 1  | 6  | 1.224 | 126.687 | -179.880 | -0.510    |
| 9   | H      | 3  | 2  | 1  | 1.014 | 116.469 | 179.930  | 0.337     |
| 10  | H      | 6  | 1  | 2  | 1.084 | 121.214 | -179.574 | 0.193     |
| 11  | H      | 1  | 6  | 5  | 1.082 | 121.384 | 179.340  | 0.155     |
| 12  | C      | 5  | 4  | 3  | 1.474 | 116.494 | -174.760 | -0.387    |
| 13  | O      | 12 | 5  | 4  | 1.424 | 112.022 | 95.796   | -0.240    |
| 14  | C      | 12 | 5  | 4  | 1.538 | 114.863 | -144.543 | 0.012     |
| 15  | H      | 12 | 5  | 4  | 1.087 | 104.613 | -19.312  | 0.182     |
| 16  | C      | 13 | 12 | 5  | 1.432 | 110.673 | 96.174   | 0.094     |
| 17  | C      | 14 | 12 | 5  | 1.540 | 105.739 | -99.647  | -0.068    |
| 18  | H      | 14 | 12 | 5  | 1.093 | 107.971 | 142.424  | 0.171     |
| 19  | H      | 14 | 12 | 5  | 1.092 | 114.044 | 22.829   | 0.193     |
| 20  | H      | 16 | 13 | 12 | 1.101 | 109.715 | -94.631  | 0.143     |
| 21  | H      | 17 | 14 | 12 | 1.096 | 111.170 | -130.088 | 0.138     |
| 22  | C      | 16 | 13 | 12 | 1.531 | 107.584 | 146.620  | -0.323    |
| 23  | H      | 22 | 16 | 13 | 1.097 | 108.880 | 50.893   | 0.167     |
| 24  | H      | 22 | 16 | 13 | 1.092 | 109.214 | -65.925  | 0.155     |
| 25  | N      | 22 | 16 | 13 | 1.458 | 110.430 | 173.516  | -0.395    |
| 26  | H      | 25 | 22 | 16 | 1.015 | 116.941 | -63.937  | 0.316     |
| 27  | O      | 17 | 14 | 12 | 1.430 | 109.020 | 109.611  | -0.513    |
| 28  | H      | 27 | 17 | 14 | 0.967 | 109.140 | 170.962  | 0.371     |
| 29  | C      | 25 | 22 | 16 | 1.379 | 128.394 | 136.699  | 0.276     |
| 30  | O      | 29 | 25 | 22 | 1.227 | 120.065 | 169.419  | -0.468    |
| 31  | C      | 29 | 25 | 22 | 1.519 | 118.013 | -11.450  | -0.347    |
| 32  | H      | 31 | 29 | 25 | 1.095 | 112.116 | -54.660  | 0.159     |
| 33  | H      | 31 | 29 | 25 | 1.096 | 111.071 | 66.030   | 0.173     |
| 34  | H      | 31 | 29 | 25 | 1.090 | 107.720 | -174.748 | 0.193     |

## F- deoxyuridines (II)

| Tag | Symbol | NA | NB | NC | Bond  | Angle   | Dihedral | MM Charge |
|-----|--------|----|----|----|-------|---------|----------|-----------|
| 1   | C      |    |    |    |       |         |          | -0.289    |
| 2   | C      | 1  |    |    | 1.453 |         |          | 0.191     |
| 3   | N      | 2  | 1  |    | 1.408 | 112.944 |          | -0.529    |
| 4   | C      | 3  | 2  | 1  | 1.383 | 128.500 | -0.944   | 0.766     |
| 5   | N      | 4  | 3  | 2  | 1.407 | 114.356 | 1.059    | 0.004     |
| 6   | C      | 1  | 2  | 3  | 1.353 | 120.162 | 0.469    | 0.168     |
| 7   | O      | 4  | 3  | 2  | 1.222 | 122.361 | -179.670 | -0.501    |
| 8   | O      | 2  | 1  | 6  | 1.224 | 126.695 | -179.805 | -0.514    |
| 9   | H      | 3  | 2  | 1  | 1.014 | 116.486 | 179.742  | 0.337     |
| 10  | H      | 6  | 1  | 2  | 1.084 | 121.060 | -179.660 | 0.192     |
| 11  | H      | 1  | 6  | 5  | 1.081 | 121.369 | 179.396  | 0.154     |
| 12  | C      | 5  | 4  | 3  | 1.479 | 116.492 | -174.697 | -0.259    |

|    |   |    |    |    |       |         |          |        |
|----|---|----|----|----|-------|---------|----------|--------|
| 13 | O | 12 | 5  | 4  | 1.423 | 111.803 | 92.346   | -0.232 |
| 14 | C | 12 | 5  | 4  | 1.541 | 114.003 | -148.554 | -0.032 |
| 15 | H | 12 | 5  | 4  | 1.087 | 104.983 | -22.879  | 0.176  |
| 16 | C | 13 | 12 | 5  | 1.431 | 108.574 | 89.976   | 0.134  |
| 17 | C | 14 | 12 | 5  | 1.542 | 105.136 | -100.929 | 0.069  |
| 18 | H | 14 | 12 | 5  | 1.092 | 108.223 | 140.854  | 0.169  |
| 19 | H | 14 | 12 | 5  | 1.092 | 114.032 | 21.332   | 0.185  |
| 20 | H | 16 | 13 | 12 | 1.102 | 109.750 | -83.896  | 0.142  |
| 21 | H | 17 | 14 | 12 | 1.097 | 110.824 | -121.118 | 0.138  |
| 22 | C | 16 | 13 | 12 | 1.523 | 110.395 | 156.423  | -0.523 |
| 23 | H | 22 | 16 | 13 | 1.099 | 109.923 | 52.981   | 0.150  |
| 24 | H | 22 | 16 | 13 | 1.095 | 109.059 | -64.467  | 0.149  |
| 25 | N | 22 | 16 | 13 | 1.475 | 107.579 | 177.769  | -0.693 |
| 26 | H | 25 | 22 | 16 | 1.015 | 111.259 | 157.678  | 0.298  |
| 27 | H | 25 | 22 | 16 | 1.017 | 110.964 | -83.490  | 0.293  |
| 28 | O | 17 | 14 | 12 | 1.426 | 110.388 | 117.675  | -0.517 |
| 29 | H | 28 | 17 | 14 | 0.970 | 106.430 | 178.852  | 0.375  |

### G- deoxyuridines (III)

| Tag | Symbol | NA | NB | NC | Bond  | Angle   | Dihedral | M Charge |
|-----|--------|----|----|----|-------|---------|----------|----------|
| 1   | C      |    |    |    |       |         |          | -0.222   |
| 2   | C      | 1  |    |    | 1.454 |         |          | 0.183    |
| 3   | N      | 2  | 1  |    | 1.410 | 113.059 |          | -0.516   |
| 4   | C      | 3  | 2  | 1  | 1.382 | 128.460 | -0.115   | 0.724    |
| 5   | N      | 4  | 3  | 2  | 1.403 | 114.071 | 0.440    | -0.033   |
| 6   | C      | 1  | 2  | 3  | 1.352 | 120.033 | 0.193    | 0.207    |
| 7   | O      | 4  | 3  | 2  | 1.224 | 122.513 | 179.824  | -0.505   |
| 8   | O      | 2  | 1  | 6  | 1.224 | 126.717 | -179.896 | -0.511   |
| 9   | H      | 3  | 2  | 1  | 1.014 | 116.427 | -179.931 | 0.339    |
| 10  | H      | 6  | 1  | 2  | 1.083 | 122.104 | 179.431  | 0.188    |
| 11  | H      | 1  | 6  | 5  | 1.081 | 121.524 | 179.721  | 0.156    |
| 12  | C      | 5  | 4  | 3  | 1.468 | 117.870 | -176.714 | -0.377   |
| 13  | O      | 12 | 5  | 4  | 1.429 | 108.684 | 120.843  | -0.315   |
| 14  | C      | 12 | 5  | 4  | 1.550 | 115.052 | -120.107 | -0.244   |
| 15  | H      | 12 | 5  | 4  | 1.090 | 104.551 | 3.106    | 0.177    |
| 16  | C      | 13 | 12 | 5  | 1.437 | 111.081 | 133.534  | 0.057    |
| 17  | C      | 14 | 12 | 5  | 1.525 | 104.765 | -110.070 | 0.361    |
| 18  | H      | 14 | 12 | 5  | 1.094 | 109.637 | 131.862  | 0.176    |
| 19  | H      | 14 | 12 | 5  | 1.092 | 112.983 | 11.736   | 0.190    |
| 20  | H      | 16 | 13 | 12 | 1.096 | 107.226 | -142.414 | 0.149    |
| 21  | H      | 17 | 14 | 12 | 1.090 | 115.437 | -148.482 | 0.171    |
| 22  | C      | 16 | 13 | 12 | 1.537 | 110.595 | 97.956   | -0.281   |
| 23  | H      | 22 | 16 | 13 | 1.100 | 107.373 | 48.886   | 0.154    |
| 24  | H      | 22 | 16 | 13 | 1.097 | 109.563 | -66.756  | 0.137    |
| 25  | N      | 22 | 16 | 13 | 1.465 | 110.037 | 174.481  | -0.597   |
| 26  | H      | 25 | 22 | 16 | 1.015 | 111.346 | 166.478  | 0.291    |
| 27  | H      | 25 | 22 | 16 | 1.017 | 111.453 | -73.794  | 0.288    |
| 28  | F      | 17 | 14 | 12 | 1.420 | 109.202 | 91.565   | -0.345   |

## H- Uridines (IV)

| Tag | Symbol | NA | NB | NC | Bond  | Angle   | Dihedral | Charge |
|-----|--------|----|----|----|-------|---------|----------|--------|
| 1   | F      |    |    |    |       |         |          | -0.352 |
| 2   | C      | 1  |    |    | 1.344 |         |          | 0.307  |
| 3   | C      | 2  | 1  |    | 1.461 | 117.435 |          | 0.327  |
| 4   | N      | 3  | 2  | 1  | 1.406 | 111.501 | -179.623 | -0.492 |
| 5   | C      | 4  | 3  | 2  | 1.388 | 129.127 | 0.343    | 0.562  |
| 6   | N      | 5  | 4  | 3  | 1.400 | 114.149 | -1.176   | -0.258 |
| 7   | C      | 2  | 1  | 3  | 1.347 | 120.763 | -179.644 | 0.082  |
| 8   | O      | 5  | 4  | 3  | 1.222 | 122.663 | 179.201  | -0.479 |
| 9   | O      | 3  | 2  | 1  | 1.218 | 126.555 | 0.195    | -0.483 |
| 10  | H      | 4  | 3  | 2  | 1.015 | 115.904 | 179.554  | 0.344  |
| 11  | H      | 7  | 2  | 1  | 1.084 | 121.428 | -0.167   | 0.175  |
| 12  | C      | 6  | 5  | 4  | 1.466 | 118.665 | 177.183  | -0.258 |
| 13  | H      | 12 | 6  | 5  | 1.092 | 107.296 | -15.742  | 0.223  |
| 14  | H      | 12 | 6  | 5  | 1.092 | 109.592 | -133.163 | 0.183  |
| 15  | C      | 12 | 6  | 5  | 1.535 | 116.474 | 104.975  | 0.346  |
| 16  | O      | 15 | 12 | 6  | 1.229 | 118.912 | 163.233  | -0.493 |
| 17  | N      | 15 | 12 | 6  | 1.353 | 117.144 | -18.033  | -0.222 |
| 18  | H      | 17 | 15 | 12 | 1.013 | 121.318 | 3.140    | 0.346  |
| 19  | C      | 17 | 15 | 12 | 1.456 | 122.211 | -179.391 | -0.440 |
| 20  | H      | 19 | 17 | 15 | 1.095 | 108.447 | -41.072  | 0.189  |
| 21  | C      | 19 | 17 | 15 | 1.525 | 107.147 | -158.284 | 0.614  |
| 22  | O      | 21 | 19 | 17 | 1.217 | 124.164 | -12.401  | -0.478 |
| 23  | O      | 21 | 19 | 17 | 1.339 | 111.562 | 168.730  | -0.260 |
| 24  | C      | 23 | 21 | 19 | 1.446 | 116.247 | 178.274  | -0.130 |
| 25  | H      | 24 | 23 | 21 | 1.089 | 105.219 | 179.938  | 0.157  |
| 26  | H      | 24 | 23 | 21 | 1.092 | 110.168 | -60.489  | 0.167  |
| 27  | H      | 24 | 23 | 21 | 1.092 | 110.138 | 60.395   | 0.168  |
| 28  | C      | 19 | 17 | 15 | 1.542 | 112.561 | 79.059   | -0.357 |
| 29  | H      | 28 | 19 | 17 | 1.092 | 108.901 | -59.085  | 0.187  |
| 30  | H      | 28 | 19 | 17 | 1.094 | 110.705 | 60.641   | 0.157  |
| 31  | H      | 28 | 19 | 17 | 1.093 | 110.341 | -178.512 | 0.168  |
